# Supplementary material for: Effects of a Fish Oil Rich in Docosahexaenoic Acid on Cardiometabolic Risk Factors and Oxidative Stress in Healthy Rats
Source: MDPI journal article supplement (doi:10.3390/md19100555), 2021-09-29
Supplement: s1 [file s1]

## **SUPPORTING INFORMATION**

### **Effects of a Fish Oil Rich in Docosahexaenoic Acid on Cardiometabolic Risk Factors and Oxidative Stress in Healthy Rats**

Bernat Miralles-Pérez <sup>1</sup>, Lucía Méndez <sup>2</sup>, Maria Rosa Nogués <sup>1,\*</sup>, Vanessa Sánchez-Martos <sup>1</sup>, Àngels Fortuño-Mar <sup>3</sup>, Sara Ramos-Romero <sup>4,5</sup>, Mercè Hereu <sup>4</sup>, Isabel Medina <sup>2</sup>, and Marta Romeu <sup>1</sup>

<sup>1</sup> Functional Nutrition, Oxidation and Cardiovascular Diseases Research Group (NFOC-SALUT), Pharmacology Unit, Department of Basic Medical Sciences, Universitat Rovira i Virgili, C/ Sant Llorenç 21, E-43201 Reus, Spain

<sup>2</sup> Chemistry of Marine Products, Department of Food Technology, Institute of Marine Research (IIM-CSIC), C/ Eduardo Cabello 6, E-36208 Vigo, Spain

<sup>3</sup> Eldine Patología, C/ Plom 32, E-43006 Tarragona, Spain

<sup>4</sup> Department of Biological Chemistry, Institute of Advanced Chemistry of Catalonia (IQAC-CSIC), C/ Jordi Girona 18-26, E-08034 Barcelona, Spain

<sup>5</sup> Current address: Department of Cell Biology, Physiology & Immunology, Faculty of Biology, University of Barcelona, Avd/ Diagonal 643, E-08028 Barcelona, Spain

\* Corresponding author: mariarosa.nogues@urv.cat; Tel +34-977-75-9355

| Table S1. Feed intake, biometric data and blood glucose.                                                                                                                                                                                                                                                                                     |             |             |             |             |         |
|----------------------------------------------------------------------------------------------------------------------------------------------------------------------------------------------------------------------------------------------------------------------------------------------------------------------------------------------|-------------|-------------|-------------|-------------|---------|
|                                                                                                                                                                                                                                                                                                                                              | Coconut     | Soybean     | EPA/DHA 1:1 | 80% DHA     | p-value |
| Feed intake                                                                                                                                                                                                                                                                                                                                  |             |             |             |             |         |
| Daily feed intake (g/rat)                                                                                                                                                                                                                                                                                                                    | 18.4 ± 1.7  | 19.2 ± 1.3  | 19.1 ± 0.8  | 19.4 ± 1.1  | NS*     |
| Biometric data                                                                                                                                                                                                                                                                                                                               |             |             |             |             |         |
| Initial body weight (g)                                                                                                                                                                                                                                                                                                                      | 403 ± 22    | 401 ± 18    | 399 ± 15    | 398 ± 14    | NS*     |
| Final body weight (g)                                                                                                                                                                                                                                                                                                                        | 435 ± 29    | 442 ± 21    | 435 ± 15    | 441 ± 25    | NS*     |
| Body weight gain (g)                                                                                                                                                                                                                                                                                                                         | 31.8 ± 10.8 | 40.5 ± 12.5 | 35.8 ± 13.6 | 43.7 ± 12.3 | NS*     |
| Perigonadal adipose tissue weight (g)                                                                                                                                                                                                                                                                                                        | 5.0 ± 1.4   | 5.2 ± 1.1   | 4.7 ± 0.7   | 4.8 ± 1.0   | NS*     |
| Adiposity index (%)                                                                                                                                                                                                                                                                                                                          | 1.2 ± 0.2   | 1.2 ± 0.2   | 1.1 ± 0.1   | 1.1 ± 0.2   | NS*     |
| Liver weight (g)                                                                                                                                                                                                                                                                                                                             | 10.9 ± 1.4  | 10.8 ± 0.8  | 10.8 ± 0.8  | 11.3 ± 1.3  | NS*     |
| Hepatosomatic index (%)                                                                                                                                                                                                                                                                                                                      | 2.5 ± 0.2   | 2.5 ± 0.1   | 2.5 ± 0.2   | 2.6 ± 0.2   | NS†     |
| Blood glucose                                                                                                                                                                                                                                                                                                                                |             |             |             |             |         |
| Glucose at week 0 (mmol/L)                                                                                                                                                                                                                                                                                                                   | 4.5 ± 0.4   | 4.6 ± 0.9   | 4.3 ± 0.6   | 4.7 ± 0.7   | NS†     |
| Glucose at week 4 (mmol/L)                                                                                                                                                                                                                                                                                                                   | 5.1 ± 0.6   | 5.0 ± 0.4   | 4.7 ± 0.4   | 4.9 ± 0.4   | NS*     |
| Glucose at week 8 (mmol/L)                                                                                                                                                                                                                                                                                                                   | 4.6 ± 0.6   | 4.6 ± 0.5   | 4.4 ± 0.4   | 4.6 ± 0.2   | NS *    |
| Values are expressed mean ± standard deviation, n = 10 rats/group. *p-value was calculated by the one-way analysis of variance followed by Scheffé <i>post-hoc</i> test. †p-value was calculated by the non-parametric Kruskal–Wallis test followed by Mann–Whitney U test. The level of statistical significance was set at p-value < 0.05. |             |             |             |             |         |

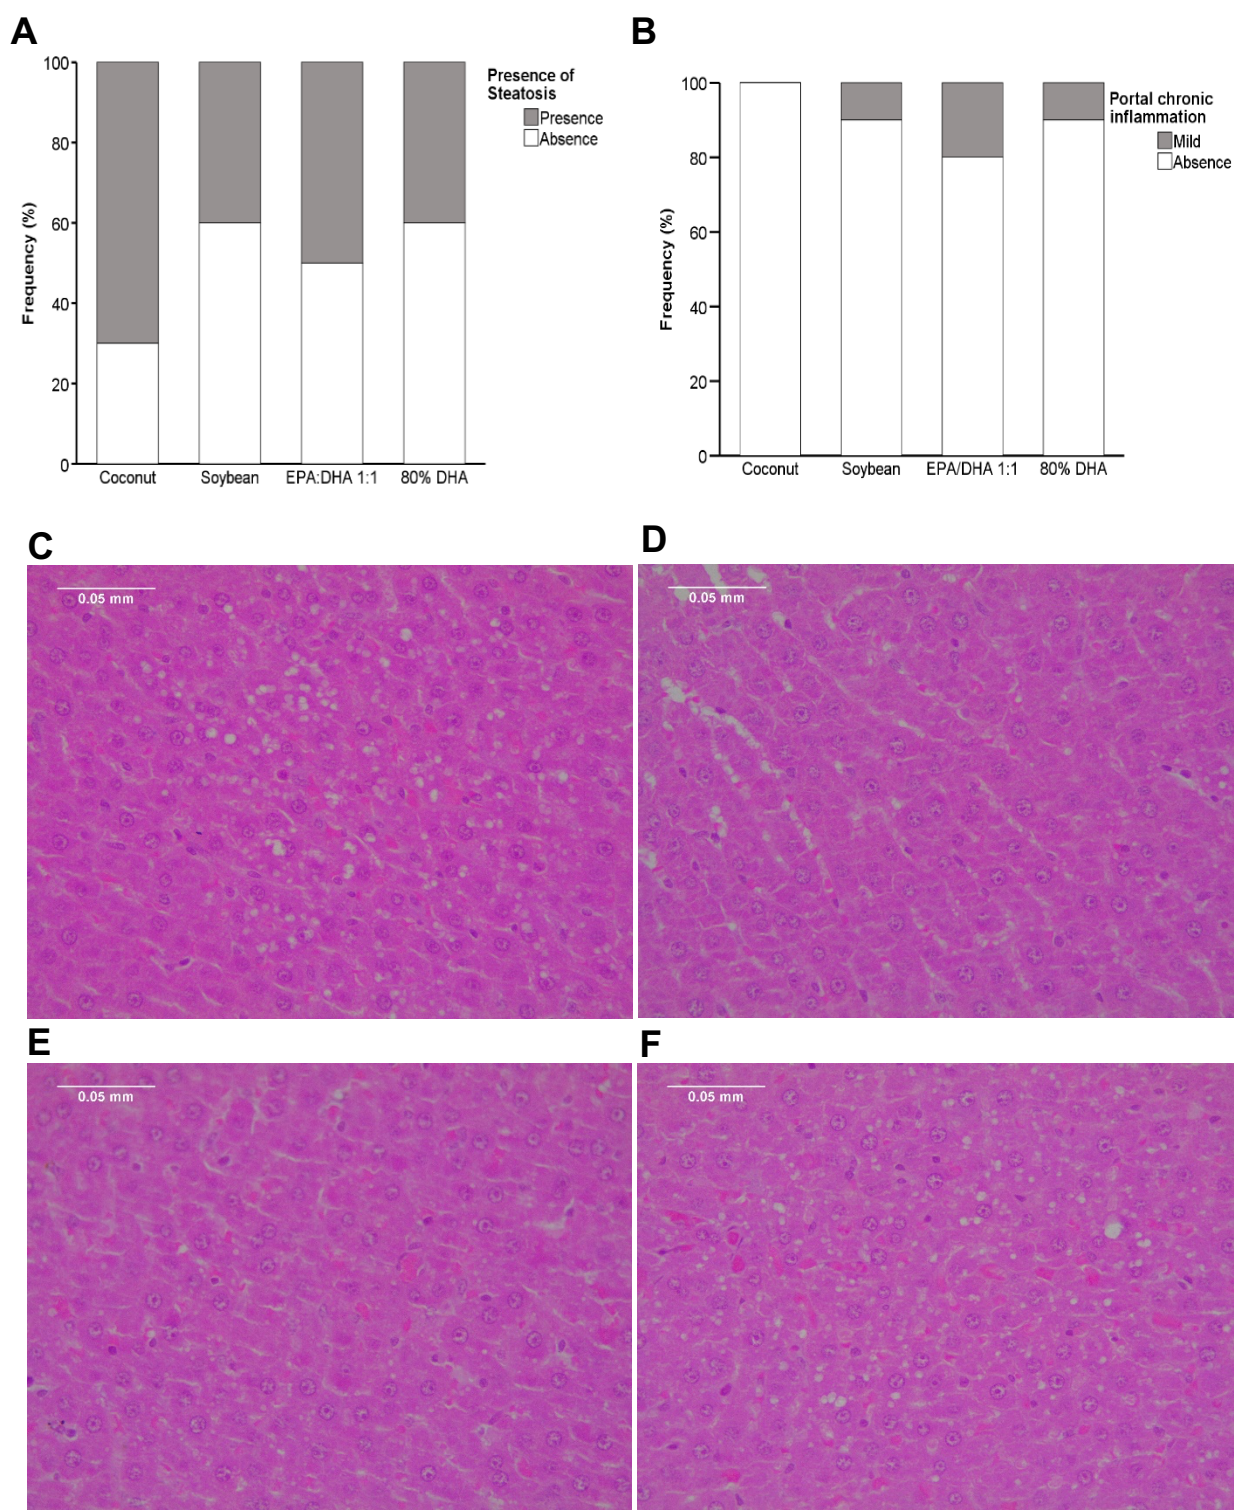

**Figure S1.** Histological analysis of the liver. Degree of steatosis (**A**); Portal chronic inflammation (**B**); Histological cuts of liver hematoxylin/eosin staining (400x) in rats supplemented with coconut oil (**C**) soybean oil (**D**) fish oil containing EPA/DHA 1:1 (**E**) or fish oil containing 80% DHA (**F**). Results are expressed as frequencies (%), n = 10 rats/group. No significant differences were found among groups ( $p$ -value > 0.05).

| <b>Table S2. Fatty acid composition of oils (mg/100 mg) *</b>                                                                                                                                                                                        |                |                |                           |                       |
|------------------------------------------------------------------------------------------------------------------------------------------------------------------------------------------------------------------------------------------------------|----------------|----------------|---------------------------|-----------------------|
|                                                                                                                                                                                                                                                      | <b>Coconut</b> | <b>Soybean</b> | <b>Fish (EPA/DHA 1:1)</b> | <b>Fish (80% DHA)</b> |
| 6:0                                                                                                                                                                                                                                                  | 0.2–0.5        |                |                           |                       |
| 8:0                                                                                                                                                                                                                                                  | 5.4–9.5        |                |                           |                       |
| 10:0                                                                                                                                                                                                                                                 | 4.5–9.7        |                |                           |                       |
| 12:0                                                                                                                                                                                                                                                 | 44.1–51.0      |                |                           |                       |
| 14:0                                                                                                                                                                                                                                                 | 13.1–18.5      | 0.12 ± 0.03    | 1.40 ± 0.05               | ND                    |
| 15:0                                                                                                                                                                                                                                                 |                | ND             | 0.43 ± 0.06               | ND                    |
| 16:0                                                                                                                                                                                                                                                 | 7.5–10.5       | 10.93 ± 0.13   | 8.39 ± 0.04               | 0.12 ± 0.02           |
| 16:1 ω-7                                                                                                                                                                                                                                             |                | 0.10 ± 0.00    | 1.92 ± 0.00               | 0.26 ± 0.01           |
| 17:0                                                                                                                                                                                                                                                 |                | 0.16 ± 0.01    | 1.38 ± 0.01               | 0.16 ± 0.02           |
| 18:0                                                                                                                                                                                                                                                 | 1.0–3.2        | 4.14 ± 0.08    | 3.74 ± 0.01               | 0.11 ± 0.02           |
| 18:1 ω-9                                                                                                                                                                                                                                             | 5.0–8.2        | 23.30 ± 0.18   | 8.09 ± 0.02               | 0.23 ± 0.03           |
| 18:1 ω-7                                                                                                                                                                                                                                             |                | 2.11 ± 0.01    | 1.88 ± 0.02               | ND                    |
| 18:2 ω-6                                                                                                                                                                                                                                             | 1.0–2.6        | 50.75 ± 0.36   | 1.29 ± 0.01               | 0.09 ± 0.02           |
| 20:0                                                                                                                                                                                                                                                 | 0.2–1.5        | 0.33 ± 0.01    | 0.47 ± 0.00               | ND                    |
| 18:3 ω-3                                                                                                                                                                                                                                             |                | 7.02 ± 0.02    | 0.45 ± 0.03               | ND                    |
| 20:1 ω-9                                                                                                                                                                                                                                             |                | 0.20 ± 0.02    | 2.44 ± 0.01               | ND                    |
| 18:4 ω-3                                                                                                                                                                                                                                             |                | ND             | 0.79 ± 0.01               | ND                    |
| 20:2 ω-6                                                                                                                                                                                                                                             |                | ND             | 0.43 ± 0.02               | ND                    |
| 20:3 ω-6                                                                                                                                                                                                                                             |                | ND             | 0.32 ± 0.01               | ND                    |
| 20:4 ω-6                                                                                                                                                                                                                                             |                | 0.49 ± 0.04    | 2.65 ± 0.04               | 0.75 ± 0.02           |
| 22:1 ω-11                                                                                                                                                                                                                                            |                | ND             | 1.53 ± 0.00               | 0.10 ± 0.01           |
| 22:1 ω-9                                                                                                                                                                                                                                             |                | ND             | 0.31 ± 0.02               | ND                    |
| 20:4 ω-3                                                                                                                                                                                                                                             |                | ND             | 1.46 ± 0.03               | 0.26 ± 0.04           |
| 20:5 ω-3                                                                                                                                                                                                                                             |                | 0.10 ± 0.01    | 27.56 ± 0.04              | 3.87 ± 0.20           |
| 24:1 ω-9                                                                                                                                                                                                                                             |                | ND             | 0.43 ± 0.01               | ND                    |
| 22:4 ω-6                                                                                                                                                                                                                                             |                | 0.25 ± 0.02    | 1.82 ± 0.00               | 1.15 ± 0.02           |
| 22:5 ω-6                                                                                                                                                                                                                                             |                | ND             | 1.52 ± 0.10               | 6.18 ± 0.40           |
| 22:5 ω-3                                                                                                                                                                                                                                             |                | ND             | 3.16 ± 0.01               | 4.09 ± 0.01           |
| 22:6 ω-3                                                                                                                                                                                                                                             |                | ND             | 26.15 ± 0.03              | 82.63 ± 0.15          |
| * Fatty acid composition of the soybean and the fish oils was measured according to the method described by Lepage and Roy [1], whereas fatty acid composition of coconut oil described by Lal et al. [2] was used. Abbreviations: ND, non-detected. |                |                |                           |                       |

## References

1. Lepage, G.; Roy, C.C. Direct transesterification of all classes of lipids in a one-step reaction. *J. Lipid Res.* 1986, 27, 114–120.
2. Lal, J.J.; Sreeranjit Kumar, C.V.; Indira, M. Coconut Palm. In *Encyclopedia of Food Sciences and Nutrition*; Trugo, L., Finglas, P.M., Eds.; Elsevier Science Ltd: Amsterdam, Netherlands, 2003; Vol. 1, pp. 1464–1475.

| <b>Table S3. Diet composition *.</b>                                                                                                                 |      |
|------------------------------------------------------------------------------------------------------------------------------------------------------|------|
| Crude protein (%)                                                                                                                                    | 14.3 |
| Fat (%)                                                                                                                                              | 4.0  |
| Carbohydrate (%)                                                                                                                                     | 48.0 |
| Crude fiber (%)                                                                                                                                      | 4.1  |
| Neutral detergent fiber (%)                                                                                                                          | 18.0 |
| Ash (%)                                                                                                                                              | 4.7  |
| Energy density (kcal/g)                                                                                                                              | 2.9  |
| Calories from protein (%)                                                                                                                            | 20   |
| Calories from fat (%)                                                                                                                                | 13   |
| Calories from carbohydrate (%)                                                                                                                       | 67   |
| * The composition of diet described by the manufacturer was used (Teklad Global 14% Protein Rodent Maintenance Diet; Envigo, Indianapolis, IN, USA). |      |
